# Supplementary material for: Computational design of transition metal catalysts for hydrodefluorination of trifluoromethylarenes using hydrosilane
Source: Royal Society of Chemistry journal article supplement (doi:10.1039/d4cy00451e), 2024-01-01
Supplement: d4cy00451e1.pdf [file d4cy00451e1.pdf]

## Supplementary Information

### Computational Design of Transition Metal Catalysts for Hydrodefluorination of Trifluoromethylarenes using Hydrosilane

Thanapat Worakul<sup>†</sup>, Boosarin Sawatlon,<sup>‡</sup> and Panida Surawatanawong<sup>\*,†,‡</sup>

<sup>†</sup>Department of Chemistry and Center of Excellence for Innovation in Chemistry, Faculty of Science,  
Mahidol University, Bangkok 10400, Thailand

<sup>‡</sup>*Department of Chemistry, Faculty of Science, Chulalongkorn University, Bangkok 10330, Thailand*

<sup>‡</sup>Center of Sustainable Energy and Green Materials, Mahidol University, Salaya, Nakhon Pathom 73170,  
Thailand

\*E-mail: [panida.sur@mahidol.ac.th](mailto:panida.sur@mahidol.ac.th)

ORCID: 0000-0002-0300-4205

**Table S1** Relative free energies of **TS1'** and **TS1''** with respect to  $[\text{NiL}_2]_2(\text{COD})$  (in kcal/mol).

| L     | $\Delta G$ (kcal/mol) |       |
|-------|-----------------------|-------|
|       | TS1'                  | TS1'' |
| CAAC0 | 45.08                 | 53.53 |
| CAAC1 | 52.15                 | 44.27 |
| CAAC2 | 45.64                 | 47.11 |
| CBA0  | 28.74                 | 39.49 |
| CBA1  | 36.45                 | 31.33 |
| CBA2  | 21.69                 | 25.55 |
| CSO0  | 57.23                 | 53.04 |
| CSO1  | 52.19                 | 51.00 |
| NHC0  | 39.04                 | 45.86 |
| NHC1  | 35.17                 | 45.95 |
| NHC2  | N/A                   | 33.54 |
| NHC3  | 32.59                 | 45.80 |
| NHC4  | 35.57                 | 48.96 |
| NHC5  | 59.81                 | 34.49 |
| NHC6  | 34.58                 | 45.64 |
| NHC7  | 49.01                 | 47.90 |
| NHC8  | 61.23                 | 43.66 |
| NHC9  | 49.20                 | 45.34 |
| P0    | 50.79                 | 44.97 |
| P1    | 47.07                 | 47.24 |
| P2    | 51.88                 | 42.25 |
| P3    | 55.44                 | 45.48 |
| P4    | 49.25                 | 49.13 |
| P5    | 52.48                 | 49.78 |
| P6    | 55.83                 | 49.66 |
| P7    | 56.69                 | 52.64 |
| aNHC0 | 38.52                 | 41.57 |
| aNHC1 | 35.79                 | 39.11 |
| aNHC2 | 32.81                 | 35.82 |
| aNHC3 | 28.21                 | 41.30 |

**Table S2** Relative free energies of **TS2'** and **TS2''** with respect to [NiL<sub>2</sub>]<sub>2</sub>(COD) (in kcal/mol).

| L     | $\Delta G$ (kcal/mol) |        |
|-------|-----------------------|--------|
|       | TS2'                  | TS2''  |
| CAAC0 | 14.50                 | 31.47  |
| CAAC1 | 23.53                 | 25.50  |
| CAAC2 | 13.83                 | 27.61  |
| CBA0  | -8.13                 | 1.59   |
| CBA1  | -10.86                | -8.76  |
| CBA2  | -11.15                | -10.12 |
| CSO0  | 26.59                 | 28.52  |
| CSO1  | 25.35                 | 27.15  |
| NHC0  | -1.82                 | 21.26  |
| NHC1  | 1.55                  | 20.35  |
| NHC2  | 12.08                 | -12.33 |
| NHC3  | -0.81                 | 2.56   |
| NHC4  | 7.84                  | 11.31  |
| NHC5  | 31.56                 | 2.36   |
| NHC6  | -1.15                 | 14.16  |
| NHC7  | 14.94                 | 20.10  |
| NHC8  | 34.98                 | 19.54  |
| NHC9  | 17.57                 | 20.09  |
| P0    | 38.96                 | 24.70  |
| P1    | 26.38                 | 19.78  |
| P2    | 40.41                 | 15.90  |
| P3    | 33.61                 | 15.74  |
| P4    | 40.29                 | 23.71  |
| P5    | 39.50                 | 27.04  |
| P6    | 52.62                 | 36.99  |
| P7    | 55.56                 | 34.88  |
| aNHC0 | 6.14                  | 20.89  |
| aNHC1 | 4.22                  | 17.64  |
| aNHC2 | -5.84                 | 11.65  |
| aNHC3 | -6.50                 | 16.02  |

**Table S3** Relative free energies ( $\Delta G_{ref}$ ) of NiL<sub>2</sub> with respect to [NiL<sub>2</sub>]<sub>2</sub>(COD) (in kcal/mol) according to the chemical equation: (1/2) [NiL<sub>2</sub>]<sub>2</sub>(COD) → NiL<sub>2</sub> + (1/2)COD.

| L     | $\Delta G_{ref}$ |
|-------|------------------|
| CAAC0 | 8.92             |
| CAAC1 | -2.39            |
| CAAC2 | 7.32             |
| CBA0  | 4.21             |
| CBA1  | 4.13             |
| CBA2  | -2.65            |
| CSO0  | 10.93            |
| CSO1  | 5.44             |
| NHC0  | 6.41             |
| NHC1  | 6.18             |
| NHC2  | -14.87           |
| NHC3  | -2.39            |
| NHC4  | 4.29             |
| NHC5  | -10.04           |
| NHC6  | 7.04             |
| NHC7  | 6.99             |
| NHC8  | 8.34             |
| NHC9  | 5.92             |
| P0    | 12.12            |
| P1    | 12.95            |
| P2    | 10.80            |
| P3    | 9.95             |
| P4    | 17.62            |
| P5    | 14.85            |
| P6    | 12.61            |
| P7    | 12.42            |
| aNHC0 | 5.43             |
| aNHC1 | -12.71           |
| aNHC2 | 0.87             |
| aNHC3 | 3.91             |

**Table S4** Relative free energies (in kcal/mol) of intermediates and transition states in the Ni-catalyzed hydrodefluorination of trifluoromethylarene with SiMe<sub>2</sub>Ph-H without CsF, using [NiL<sub>2</sub>]<sub>2</sub>(COD) as the reference state.

| L     | INT2  | TS1   | INT3   | INT4   | TS2    | INT5   | INT6   | TS3    |
|-------|-------|-------|--------|--------|--------|--------|--------|--------|
| CAAC0 | 6.64  | 45.08 | -15.23 | -15.93 | 14.50  | -34.17 | -31.32 | -6.89  |
| CAAC1 | 11.58 | 44.27 | -0.54  | -13.94 | 23.53  | -28.55 | -22.37 | -9.75  |
| CAAC2 | 7.72  | 45.64 | -14.01 | -17.91 | 13.83  | -33.89 | -21.80 | -8.70  |
| CBA0  | -2.13 | 28.74 | -29.32 | -30.44 | -8.13  | -40.62 | -44.46 | -11.53 |
| CBA1  | 1.12  | 31.33 | -29.55 | -35.60 | -10.86 | -43.95 | -43.58 | -10.72 |
| CBA2  | -1.59 | 21.69 | -31.93 | -35.82 | -11.15 | -46.99 | -43.53 | -11.04 |
| CSO0  | 11.62 | 53.04 | 3.49   | -1.35  | 26.59  | -22.11 | -18.43 | -4.06  |
| CSO1  | 11.43 | 51.00 | 0.79   | 1.45   | 25.35  | -20.01 | -17.24 | -3.58  |
| NHC0  | 5.54  | 39.04 | -16.56 | -18.61 | -1.82  | -36.69 | -34.82 | -9.33  |
| NHC1  | 2.09  | 35.17 | -18.01 | -23.02 | 1.55   | -36.32 | -36.90 | -9.70  |
| NHC2  | 6.33  | 33.54 | -13.18 | -24.79 | -12.33 | -39.83 | -34.98 | -13.22 |
| NHC3  | 2.47  | 32.59 | -15.19 | -25.90 | -0.81  | -40.30 | -34.37 | -11.61 |
| NHC4  | 5.85  | 35.57 | -15.78 | -18.07 | 7.84   | -36.93 | -32.60 | -12.26 |
| NHC5  | 10.18 | 34.49 | -7.36  | -29.99 | 2.36   | -42.38 | -29.53 | -15.37 |
| NHC6  | 0.81  | 34.58 | -18.66 | -24.12 | -1.15  | -38.54 | -38.22 | -10.53 |
| NHC7  | 8.73  | 47.90 | -6.91  | -11.28 | 14.94  | -29.26 | -25.48 | -6.25  |
| NHC8  | 11.26 | 43.66 | -2.05  | -6.02  | 19.54  | -25.18 | -21.91 | -6.02  |
| NHC9  | 8.44  | 45.34 | -4.57  | -9.51  | 17.57  | -25.74 | -24.13 | -6.62  |
| P0    | 11.41 | 44.97 | 7.54   | 3.29   | 24.70  | -16.56 | -15.68 | -2.34  |
| P1    | 9.27  | 47.07 | 0.78   | -3.66  | 19.78  | -22.57 | -19.84 | -9.28  |
| P2    | 10.12 | 42.25 | 4.09   | -7.59  | 15.90  | -23.52 | -16.73 | -7.41  |
| P3    | 15.52 | 45.48 | 10.17  | -1.44  | 15.74  | -27.24 | -15.51 | -5.71  |
| P4    | 11.93 | 49.13 | 7.70   | 10.80  | 23.71  | -16.61 | -11.92 | -2.12  |
| P5    | 15.51 | 49.78 | 8.64   | 7.61   | 27.04  | -12.31 | -13.73 | -1.44  |
| P6    | 15.59 | 49.66 | 30.09  | 26.90  | 36.99  | 3.13   | -0.24* | 1.69*  |
| P7    | 15.95 | 52.64 | 22.43  | 28.18  | 34.88  | 0.81   | -2.95* | 2.85*  |
| aNHC0 | 3.22  | 38.52 | -17.51 | -21.64 | 6.14   | -36.59 | -35.75 | -9.97  |
| aNHC1 | 1.13  | 35.79 | -16.18 | -27.37 | 4.22   | -37.84 | -33.68 | -12.69 |
| aNHC2 | -1.20 | 32.81 | -24.57 | -27.75 | -5.84  | -41.36 | -36.10 | -10.65 |
| aNHC3 | -1.34 | 28.21 | -27.47 | -29.25 | -6.50  | -38.94 | -38.61 | -9.76  |

\*The iterative imputer method was used to determine these relative energies.

**Table S5** Relative free energies (in kcal/mol) of intermediates and transition states in the Ni-catalyzed hydrodefluorination of trifluoromethylarene with SiMe<sub>2</sub>Ph-H without CsF, using NiL<sub>2</sub> as the reference state.

| L     | INT2  | TS1   | INT3   | INT4   | TS2    | INT5   | INT6    | TS3     |
|-------|-------|-------|--------|--------|--------|--------|---------|---------|
| CAAC0 | -2.28 | 36.16 | -24.15 | -24.85 | -5.64  | -43.09 | -40.24  | -15.81  |
| CAAC1 | 13.96 | 46.65 | 1.84   | -11.55 | 13.41  | -26.17 | -19.99  | -7.37   |
| CAAC2 | 0.40  | 38.32 | -21.33 | -25.23 | 6.51   | -41.22 | -29.13  | -16.02  |
| CBA0  | -6.35 | 24.53 | -33.53 | -34.65 | -12.34 | -44.84 | -48.67  | -15.74  |
| CBA1  | -3.01 | 27.21 | -33.68 | -39.72 | -14.98 | -48.07 | -47.71  | -14.84  |
| CBA2  | 1.06  | 24.33 | -29.28 | -33.17 | -8.50  | -44.35 | -40.88  | -8.39   |
| CSO0  | 0.69  | 42.12 | -7.43  | -12.28 | 15.67  | -33.04 | -29.36  | -14.99  |
| CSO1  | 6.00  | 45.57 | -4.64  | -3.99  | 19.92  | -25.45 | -22.67  | -9.01   |
| NHC0  | -0.87 | 32.63 | -22.97 | -25.02 | -8.23  | -43.11 | -41.23  | -15.74  |
| NHC1  | -4.09 | 28.99 | -24.19 | -29.21 | -4.63  | -42.51 | -43.09  | -15.88  |
| NHC2  | 21.20 | 48.41 | 1.70   | -9.92  | 2.55   | -24.96 | -20.11  | 1.65    |
| NHC3  | 4.86  | 34.97 | -12.81 | -23.52 | 1.57   | -37.92 | -31.99  | -9.23   |
| NHC4  | 1.57  | 31.29 | -20.06 | -22.35 | 3.56   | -41.22 | -36.88  | -16.54  |
| NHC5  | 20.22 | 44.53 | 2.68   | -19.95 | 12.40  | -32.35 | -19.49  | -5.34   |
| NHC6  | -6.22 | 27.55 | -25.70 | -31.15 | -8.18  | -45.58 | -45.25  | -17.57  |
| NHC7  | 1.74  | 40.91 | -13.90 | -18.27 | 7.96   | -36.25 | -32.47  | -13.24  |
| NHC8  | 2.91  | 35.31 | -10.39 | -14.36 | 11.20  | -33.52 | -30.25  | -14.36  |
| NHC9  | 2.53  | 39.42 | -10.48 | -15.42 | 11.66  | -31.65 | -30.05  | -12.53  |
| P0    | -0.70 | 32.86 | -4.57  | -8.83  | 12.59  | -28.67 | -27.80  | -14.45  |
| P1    | -3.68 | 34.12 | -12.17 | -16.61 | 6.83   | -35.52 | -32.79  | -22.23  |
| P2    | -0.67 | 31.46 | -6.71  | -18.38 | 5.11   | -34.32 | -27.53  | -18.20  |
| P3    | 5.58  | 35.54 | 0.23   | -11.38 | 5.80   | -37.19 | -25.45  | -15.65  |
| P4    | -5.70 | 31.51 | -9.92  | -6.82  | 6.09   | -34.23 | -29.54  | -19.74  |
| P5    | 0.66  | 34.93 | -6.21  | -7.24  | 12.19  | -27.16 | -28.58  | -16.29  |
| P6    | 2.99  | 37.06 | 17.49  | 14.30  | 24.82  | -9.48  | -11.99* | -13.76* |
| P7    | 3.53  | 40.22 | 10.01  | 15.76  | 22.46  | -11.61 | -13.53* | -11.74* |
| aNHC0 | -2.20 | 33.09 | -22.94 | -27.06 | -2.66  | -42.02 | -41.18  | -15.40  |
| aNHC1 | 13.84 | 48.50 | -3.47  | -14.66 | 16.93  | -25.13 | -20.97  | 0.01    |
| aNHC2 | -2.06 | 31.94 | -25.43 | -28.61 | -6.70  | -42.23 | -36.97  | -11.52  |
| aNHC3 | -5.25 | 24.31 | -31.38 | -33.15 | -10.40 | -42.85 | -42.52  | -13.67  |

\*The iterative imputer method was used to determine these relative energies.

**Table S6** Relative free energies (in kcal/mol) of intermediates and transition states in the Ni-catalyzed hydrodefluorination of trifluoromethylarene with SiMe<sub>2</sub>Ph-H in the presence of CsF, using [NiL<sub>2</sub>]<sub>2</sub>(COD) as the reference state.

| L     | INT2  | TS1   | INT3   | INT4   | TS2    | INT5   | INT6    | TS3    |
|-------|-------|-------|--------|--------|--------|--------|---------|--------|
| CAACO | 6.64  | 42.90 | -23.11 | -20.15 | -2.19  | -32.66 | -29.81  | -5.38  |
| CBA0  | 4.37  | 21.53 | -41.61 | -42.68 | -16.36 | -36.96 | -42.95  | -10.02 |
| NHC0  | 5.54  | 34.46 | -20.54 | -22.98 | -6.31  | -35.18 | -33.31  | -7.82  |
| NHC1  | 2.09  | 29.72 | -26.55 | -27.61 | -8.68  | -34.81 | -35.39  | -8.19  |
| NHC3  | 2.47  | 28.35 | -26.73 | -29.70 | 2.22   | -38.79 | -32.86  | -10.10 |
| NHC9  | 8.44  | 45.79 | -7.70  | -8.61  | 14.60  | -24.23 | -22.62  | -5.11  |
| P1    | 9.27  | 41.56 | -3.05  | -5.95  | 16.04  | -21.06 | -18.33  | -7.77  |
| P4    | 11.93 | 41.48 | 3.55   | -5.94  | 14.69  | -15.10 | -10.40  | -0.61  |
| P5    | 15.51 | 43.94 | 1.15   | 4.72   | 23.53  | -10.80 | -12.22  | 0.07   |
| P7    | 15.95 | 39.60 | -2.41  | -0.14  | 23.73  | 2.32   | -11.18* | -0.89* |

\*The iterative imputer method was used to determine these relative energies.

**Table S7** Correlation ( $R^2$ ) and mean absolute error (MAE) metrics of  $\Delta G_{RRS}(\text{INT3})$  and  $\Delta G_{RRS}(\text{INT4})$  as descriptor variables with  $\Delta G_{RRS}(\text{TS1})$  and  $\Delta G_{RRS}(\text{TS3})$  under [NiL<sub>2</sub>]<sub>2</sub>(COD) (REF1) and NiL<sub>2</sub> (REF2) reference states.

| Descriptor:                                   |     | INT3           | INT4 |
|-----------------------------------------------|-----|----------------|------|
| [NiL <sub>2</sub> ] <sub>2</sub> (COD) (REF1) | TS1 | R <sup>2</sup> | 0.71 |
|                                               |     | MAE (kcal/mol) | 3.49 |
|                                               | TS3 | R <sup>2</sup> | 0.66 |
|                                               |     | MAE (kcal/mol) | 2.04 |
| NiL <sub>2</sub> (REF2) (L = carbene)         | TS1 | R <sup>2</sup> | 0.87 |
|                                               |     | MAE (kcal/mol) | 2.43 |
|                                               | TS3 | R <sup>2</sup> | 0.47 |
|                                               |     | MAE (kcal/mol) | 3.09 |

**Table S8** Correlations ( $R^2$ ) between the energy descriptors and the electronic/steric variables obtained for  $\text{NiL}(\text{CO})_3$  (L = carbene and phosphine) using  $\omega\text{B97XD}/\text{def2-TZVP}/\omega\text{B97XD}/\text{def2-SVP}$ .

|                                         | $\Delta G_{\text{RRS},[\text{NiL}_2]_2(\text{COD})(\text{INT4})}$ | $\Delta G_{\text{RRS},\text{NiL}_2}(\text{INT3})$ | $\Delta G_{\text{ref}}$ |
|-----------------------------------------|-------------------------------------------------------------------|---------------------------------------------------|-------------------------|
| <b><sup>a</sup>Electronic variables</b> |                                                                   |                                                   |                         |
| $q_{\text{Ni}}$                         | 0.714                                                             | 0.315                                             | 0.412                   |
| $\text{WBI}_{\text{avg}}(\text{C-O})$   | 0.914                                                             | 0.587                                             | 0.303                   |
| $\text{WBI}_{\text{max}}(\text{Ni-CO})$ | 0.823                                                             | 0.619                                             | 0.200                   |
| <b>Steric variables</b>                 |                                                                   |                                                   |                         |
| <sup>b</sup> $V_b$                      | 0.274                                                             | 0.012                                             | 0.347                   |
| <sup>c</sup> B5                         | 0.457                                                             | 0.178                                             | 0.230                   |
| <sup>c</sup> B1                         | 0.108                                                             | 0.000                                             | 0.116                   |

<sup>a</sup>The natural population analysis (NPA) charge on Ni ( $q_{\text{Ni}}$ ) and Wiberg bond index (WBI) were obtained from natural bond orbital (NBO)<sup>1</sup> calculation of  $\text{NiL}(\text{CO})_3$ .

<sup>b</sup>Buried volume<sup>2</sup> ( $V_b$ ) was calculated with Ni as the center of the sphere with Ni-L as the z-axis. The sphere radius used to calculate buried volume is 3.5 Å.

<sup>c</sup>Sterimol steric parameters:<sup>3-5</sup> (i) B1 is the minimum distance perpendicular to the primary axis of Ni-L, indicating the shortest distance of a substituent on L and (ii) B5 represents the maximum distance perpendicular to the primary axis, signifying the farthest distance of a substituent on L. The Ni-L is chosen as the primary axis.

**Table S9** Wiberg bond index (WBI) as a measure of bond covalency for the selected pair of atoms in the nickel catalyzed hydrodefluorination of trifluoromethylarene with  $\text{SiMe}_2\text{Ph-H}$  in the absence and the presence of CsF (L = NHC0).

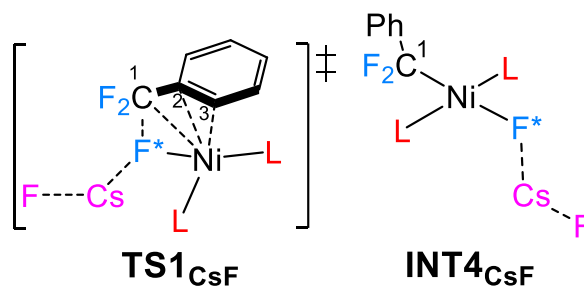

| WBI                       | Ni-F* | C1-F* | Ni-C1 | C1-C2 | C2-C3 | Ni-C2 | Ni-C3 | Cs-F* |
|---------------------------|-------|-------|-------|-------|-------|-------|-------|-------|
| $\text{PhCF}_3$           | -     | 0.908 | -     | 0.964 | 1.417 | -     | -     | -     |
| <b>INT2</b>               | -     | 0.875 | 0.021 | 0.989 | 1.174 | 0.322 | 0.360 | -     |
| <b>TS1</b>                | 0.053 | 0.154 | 0.183 | 1.312 | 1.118 | 0.146 | 0.399 | -     |
| <b>TS1<sub>CsF</sub></b>  | 0.055 | 0.221 | 0.094 | 1.409 | 1.084 | 0.087 | 0.448 | 0.015 |
| <b>INT4</b>               | 0.232 | -     | 0.582 | 1.005 | 1.403 | -     | -     | -     |
| <b>INT4<sub>CsF</sub></b> | 0.188 | -     | 0.616 | 1.003 | 1.406 | -     | -     | 0.012 |



**Table S10** NPA charge ( $q$ ) on selected chemical species in the nickel catalyzed hydrodefluorination of trifluoromethylarene with  $\text{SiMe}_2\text{Ph-H}$  in the absence and the presence of  $\text{CsF}$  ( $\text{L} = \text{NHC0}$ ).

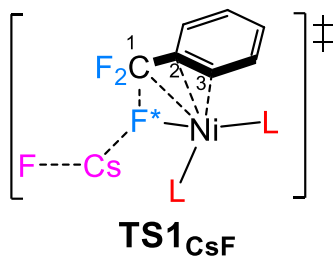

| $q$                      | Ni    | F*     | C1    | C2     | C3     | Cs    |
|--------------------------|-------|--------|-------|--------|--------|-------|
| CsF                      | -     | -      | -     |        |        | 0.939 |
| PhCF <sub>3</sub>        | -     | -0.318 | 0.959 | -0.146 | -0.185 | -     |
| <b>INT2</b>              | 0.407 | -0.346 | 0.971 | -0.356 | -0.415 | -     |
| <b>TS1</b>               | 0.632 | -0.790 | 0.952 | -0.377 | -0.411 | -     |
| <b>TS1<sub>CsF</sub></b> | 0.626 | -0.764 | 0.934 | -0.388 | -0.452 | 0.969 |

**Table S11** Calculated buried volume ( $V_b$ ) and Wiberg bond index (WBI) of C-O for  $\text{NiL}(\text{CO})_3$  using  $\omega\text{B97XD}/\text{def2-TZVP}/\omega\text{B97XD}/\text{def2-SVP}$ .

| L     | $V_b$ | $\text{WBI}_{\text{avg}}(\text{C-O})$ |
|-------|-------|---------------------------------------|
| CAAC0 | 0.291 | 2.064                                 |
| CAAC1 | 0.358 | 2.068                                 |
| CAAC2 | 0.312 | 2.061                                 |
| CBA0  | 0.260 | 2.030                                 |
| CBA1  | 0.307 | 2.039                                 |
| CBA2  | 0.310 | 2.028                                 |
| CSO0  | 0.206 | 2.092                                 |
| CSO1  | 0.234 | 2.094                                 |
| NHC0  | 0.263 | 2.061                                 |
| NHC1  | 0.282 | 2.060                                 |
| NHC2  | 0.357 | 2.067                                 |
| NHC3  | 0.306 | 2.058                                 |
| NHC4  | 0.319 | 2.064                                 |
| NHC5  | 0.357 | 2.060                                 |
| NHC6  | 0.282 | 2.058                                 |
| NHC7  | 0.269 | 2.077                                 |
| NHC8  | 0.330 | 2.089                                 |
| NHC9  | 0.237 | 2.084                                 |
| P0    | 0.180 | 2.099                                 |
| P1    | 0.237 | 2.079                                 |
| P2    | 0.308 | 2.073                                 |
| P3    | 0.319 | 2.073                                 |
| P4    | 0.299 | 2.090                                 |
| P5    | 0.266 | 2.100                                 |
| P6    | 0.244 | 2.142                                 |
| P7    | 0.218 | 2.139                                 |
| aNHC0 | 0.285 | 2.048                                 |
| aNHC1 | 0.303 | 2.044                                 |
| aNHC2 | 0.303 | 2.045                                 |
| aNHC3 | 0.310 | 2.049                                 |

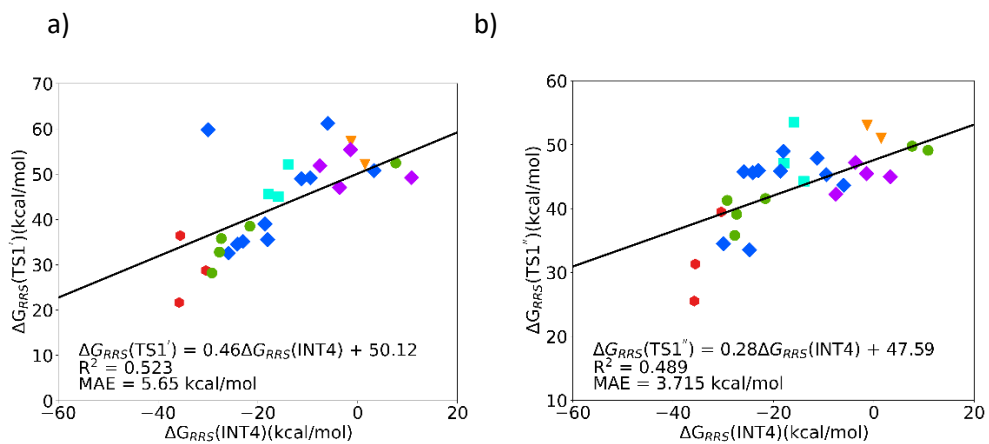

**Fig. S1** (a) Linear free energy scaling relationship between  $\Delta G_{RRS}(INT4)$  and  $\Delta G_{RRS}(TS1')$ . (b) Linear free energy scaling relationship between  $\Delta G_{RRS}(INT4)$  and  $\Delta G_{RRS}(TS1'')$ .  $[NiL_2]_2COD$  is the reference state.

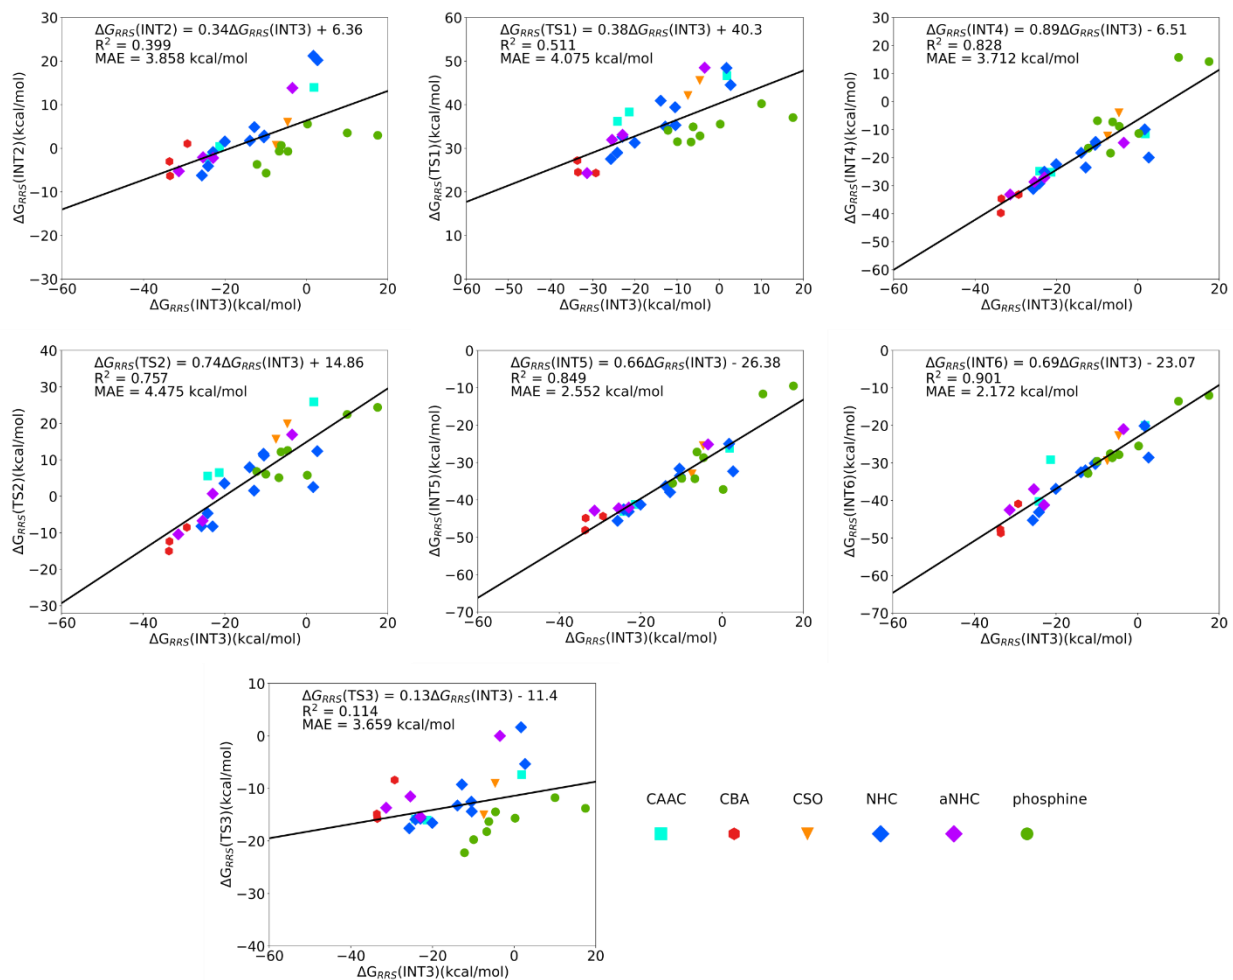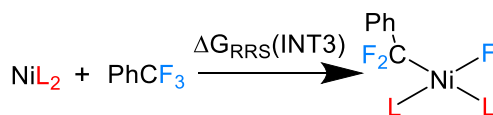

**Fig. S2** Linear free energy scaling relationships between  $\Delta G_{RRS,REF2}(INT3)$  and relative energies of other intermediates and transition states in the absence of CsF, using  $NiL_2$  (L = carbene and phosphine) as the reference state for nickel catalyzed hydrodefluorination of trifluoromethylarene.

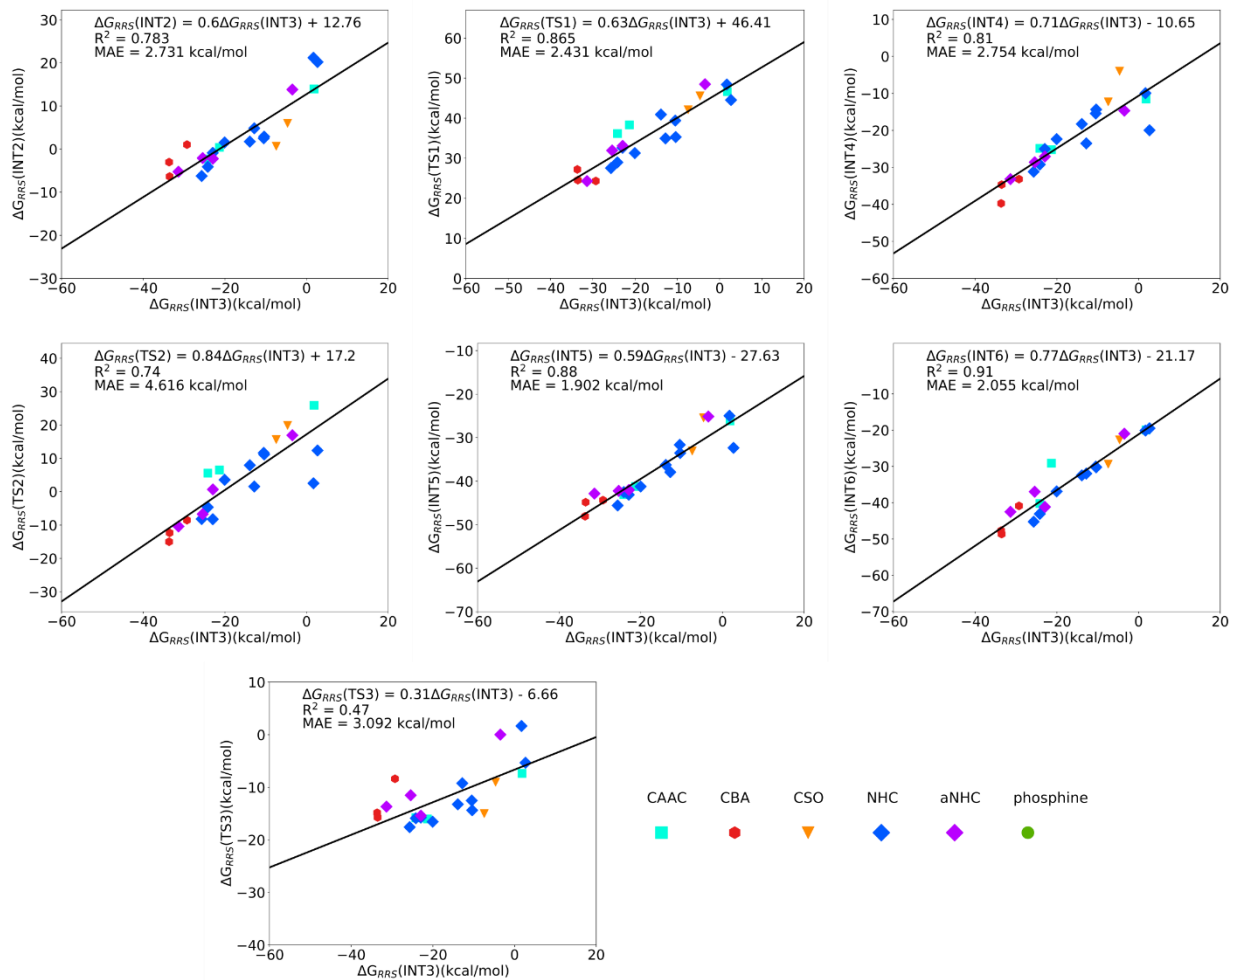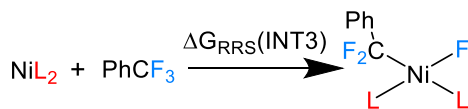

**Fig. S3** Linear free energy scaling relationships between  $\Delta G_{RRS,REF2}(INT3)$  and relative energies of other intermediates and transition states in the absence of CsF using  $NiL_2$  ( $L = \text{carbene}$ ) as the reference state for nickel catalyzed hydrodefluorination of trifluoromethylarene.

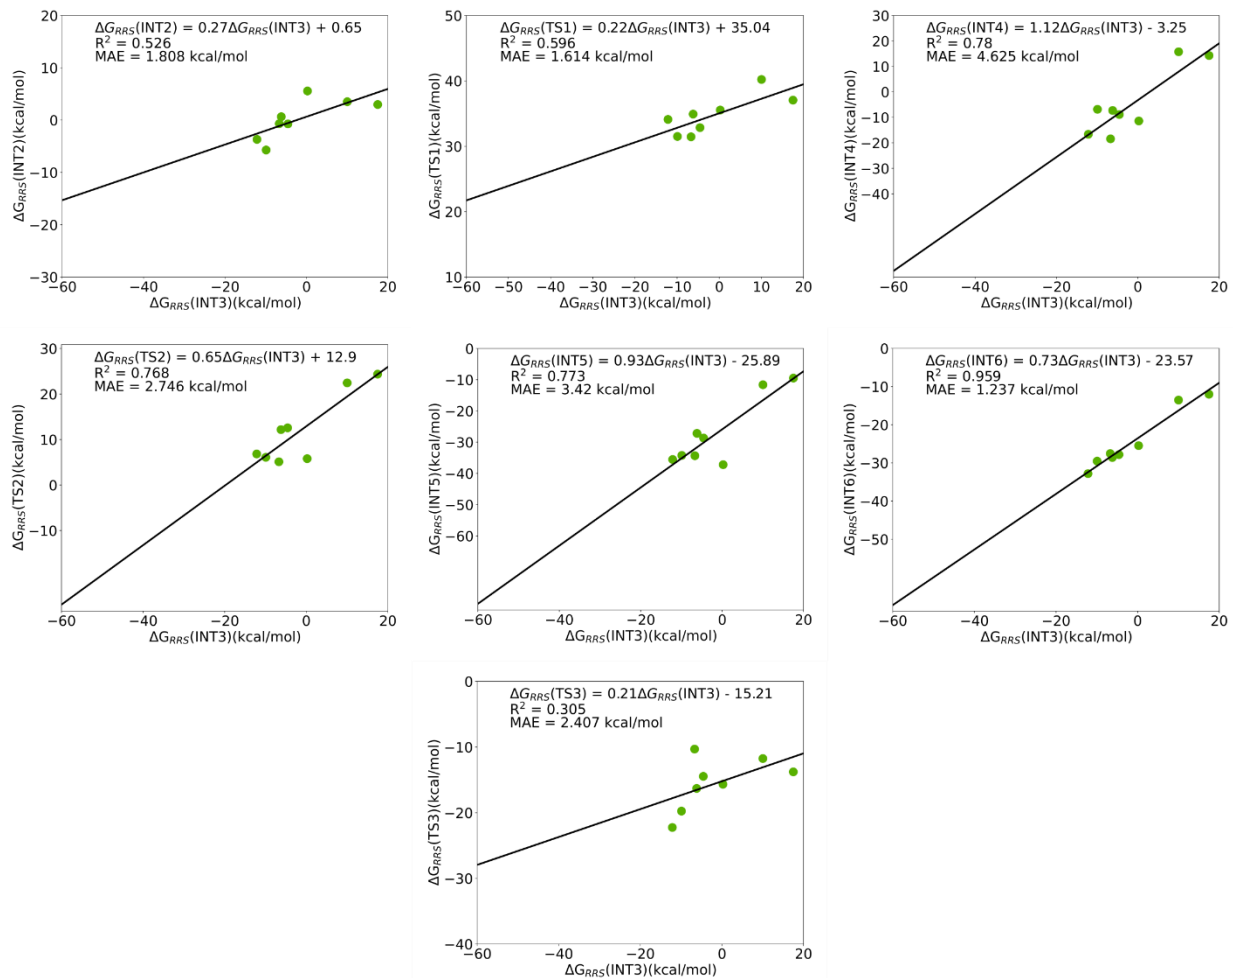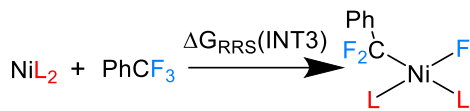

**Fig. S4** Linear free energy scaling relationships between  $\Delta G_{RRS,REF2}(INT3)$  and relative energies of other intermediates and transition states in the absence of CsF under  $NiL_2$  ( $L =$  phosphine) as the reference state for nickel catalyzed hydrodefluorination of trifluoromethylarene.

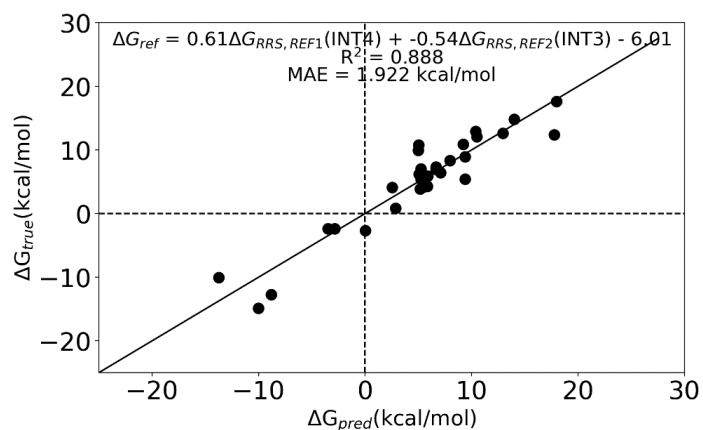

**Fig. S5** Multivariate linear regression model for the relative stability of  $[\text{NiL}_2]_2(\text{COD})$  with respect to  $\text{NiL}_2$  ( $\Delta G_{ref}$ ) using  $\Delta G_{RRS,REF1}(\text{INT4})$  and  $\Delta G_{RRS,REF2}(\text{INT3})$  as variables. REF1 refers to  $[\text{NiL}_2]_2(\text{COD})$  and REF2 refers to  $\text{NiL}_2$  as the reference state.

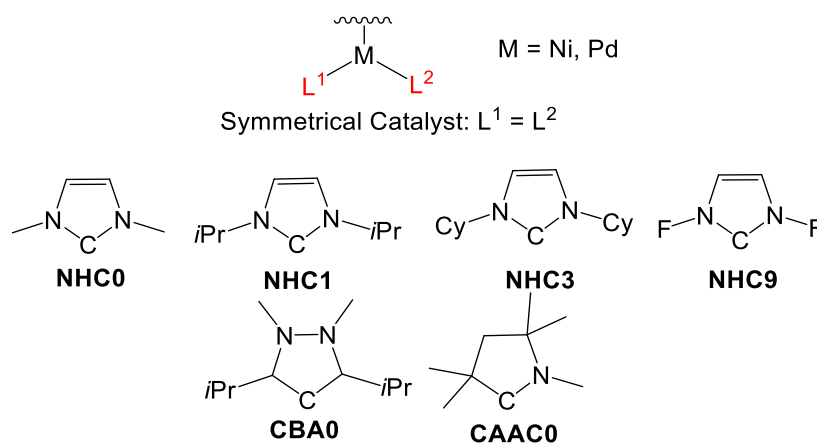

**Fig. S6** Ligands on the metal center used to establish Ni/Pd LFESRs.

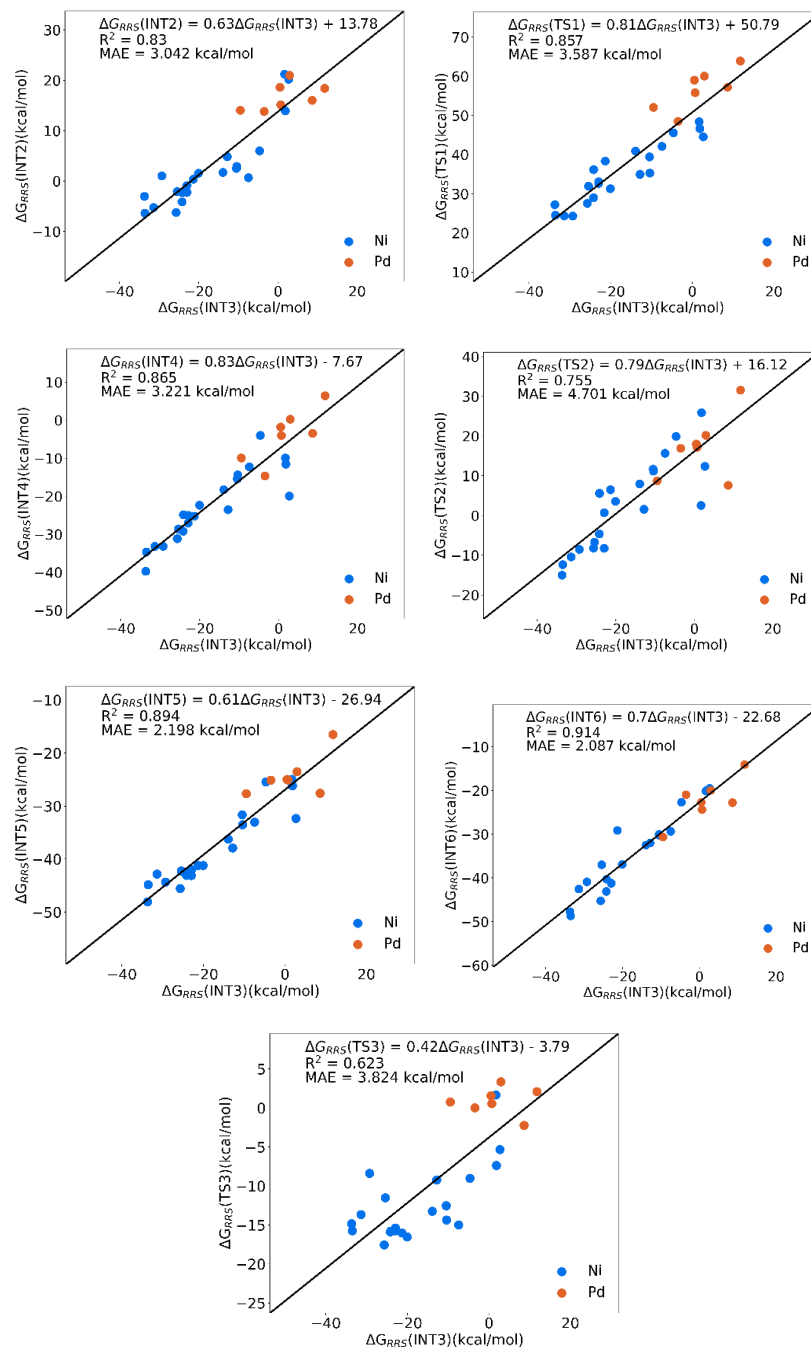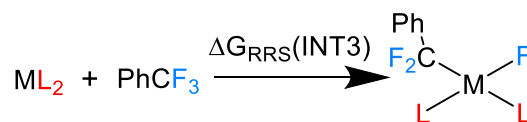

**Fig. S7** Linear free energy scaling relationships for the catalytic hydrodefluorination of trifluoromethylarene with  $SiMe_2Ph-H$  in the absence of  $CsF$ , using  $ML_2$  as the reference state ( $M = Ni, Pd$ ).



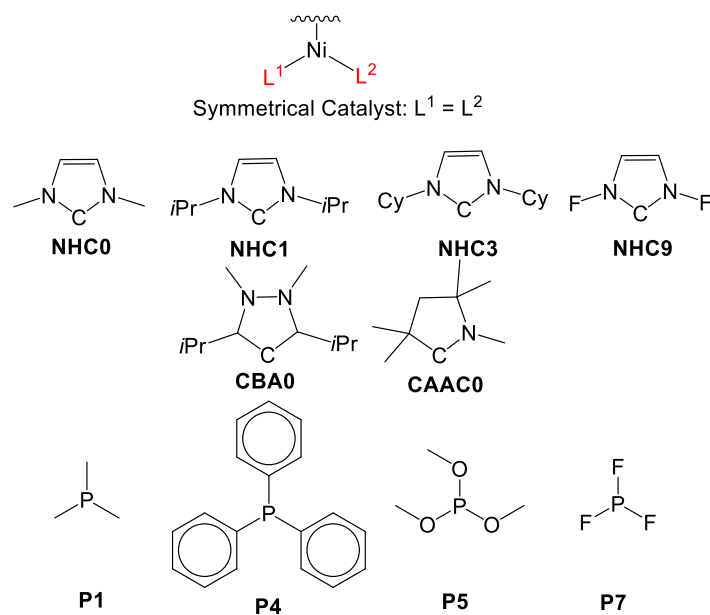

**Fig. S8** Ligands on the Ni center used to establish LFESRs for the Ni-catalyzed hydrodefluorination of trifluoromethylarene with  $\text{SiMe}_2\text{Ph-H}$  in the presence of  $\text{CsF}$ , using  $[\text{NiL}_2]_2(\text{COD})$  as the reference state.

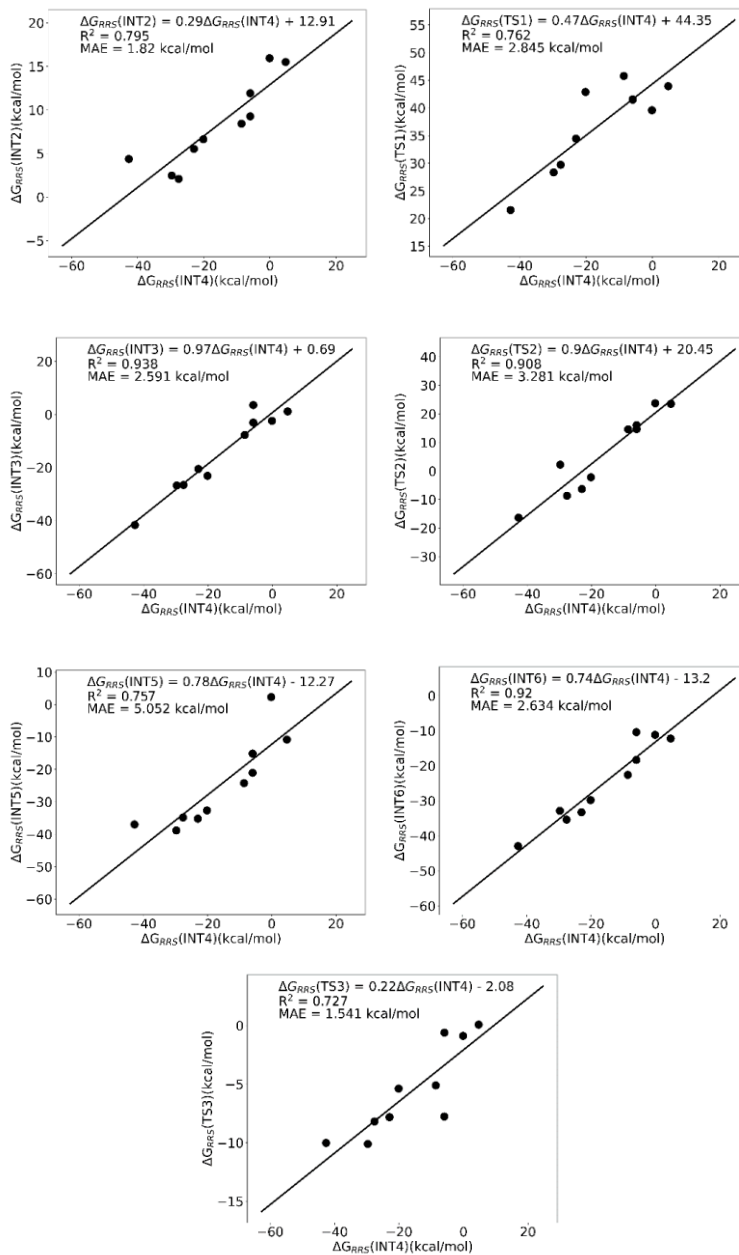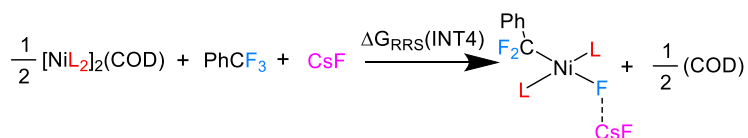

**Fig. S9** Linear free energy scaling relationships for the Ni-catalyzed hydrodefluorination of trifluoromethylarene with SiMe<sub>2</sub>Ph-H in the presence of CsF, using [NiL<sub>2</sub>]<sub>2</sub>(COD) as the reference state.

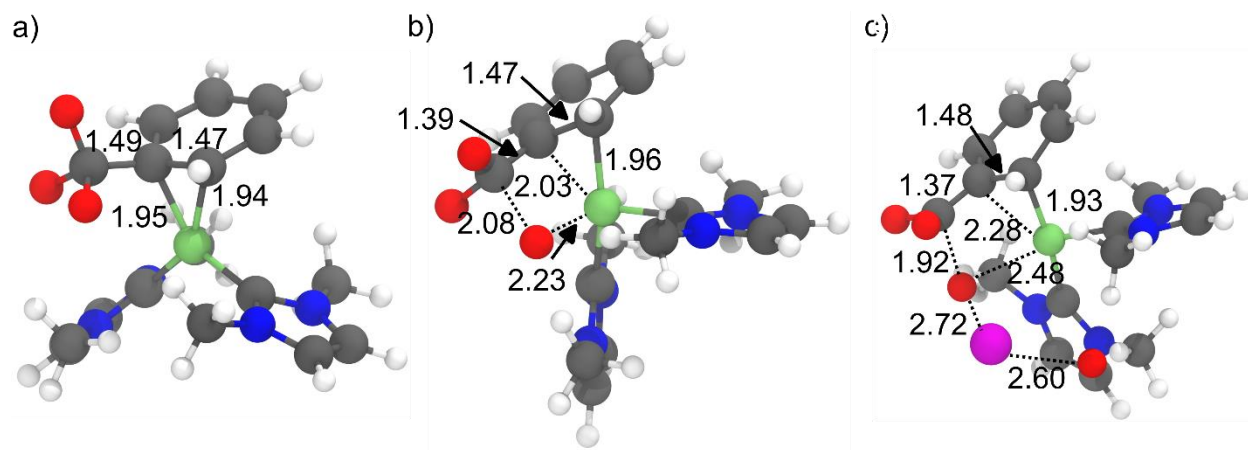

**Fig. S10** Optimized structures of (a) **INT2**, (b) **TS1**, and (c) **TS1<sub>CsF</sub>** with NHC0 as a ligand.

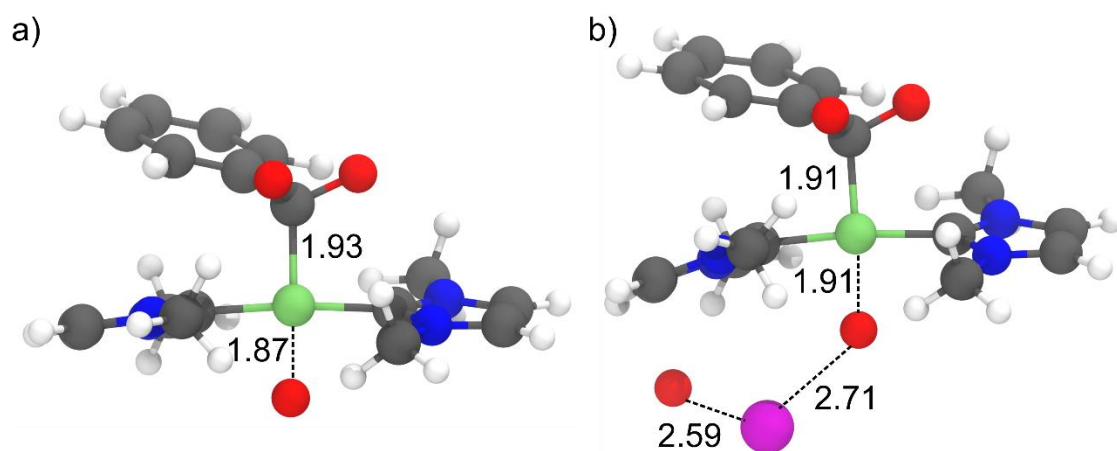

**Fig. S11** Optimized structure of (a) **INT4** and (b) **INT4<sub>CsF</sub>** with NHC0 as a ligand.

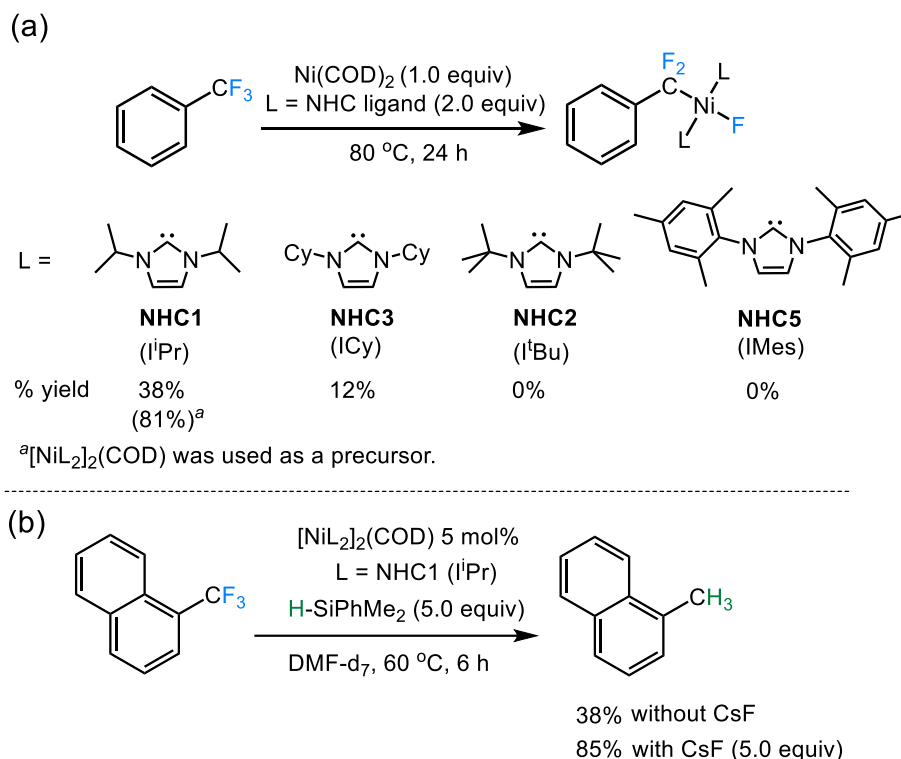

**Fig. S12** (a) The C-F activation of PhCF<sub>3</sub> by Ni complexes with N-heterocyclic carbene (NHC) ligands and (b) nickel catalyzed hydrodefluorination of ArCF<sub>3</sub> with HSiPhMe<sub>2</sub> using **NHC1** (iPr) ligand (J. Am. Chem. Soc. 2020, 142, 19360).<sup>6</sup>

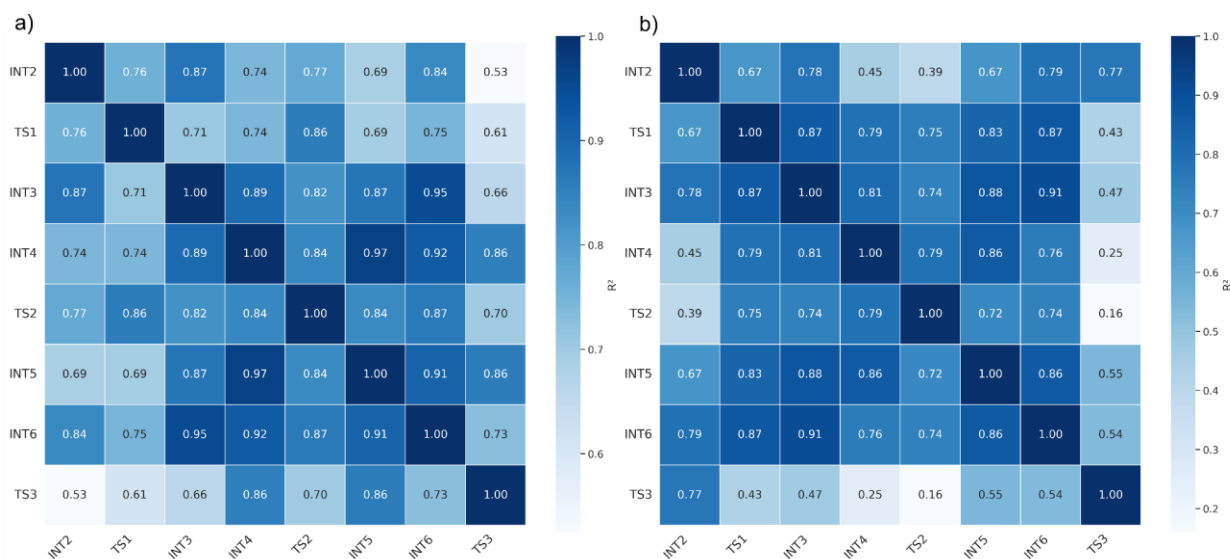

**Fig. S13** Correlation matrix from the linear scaling relationships between relative free energies of all species in the catalytic hydrodefluorination of trifluoromethylarene: (a)  $\Delta G_{\text{RRS,REF1}}$  for [NiL<sub>2</sub>]<sub>2</sub>(COD) as a reference state (REF1) (L = carbene and phosphine) and (b)  $\Delta G_{\text{RRS,REF2}}$  for NiL<sub>2</sub> as a reference state (REF2) (L = carbene).

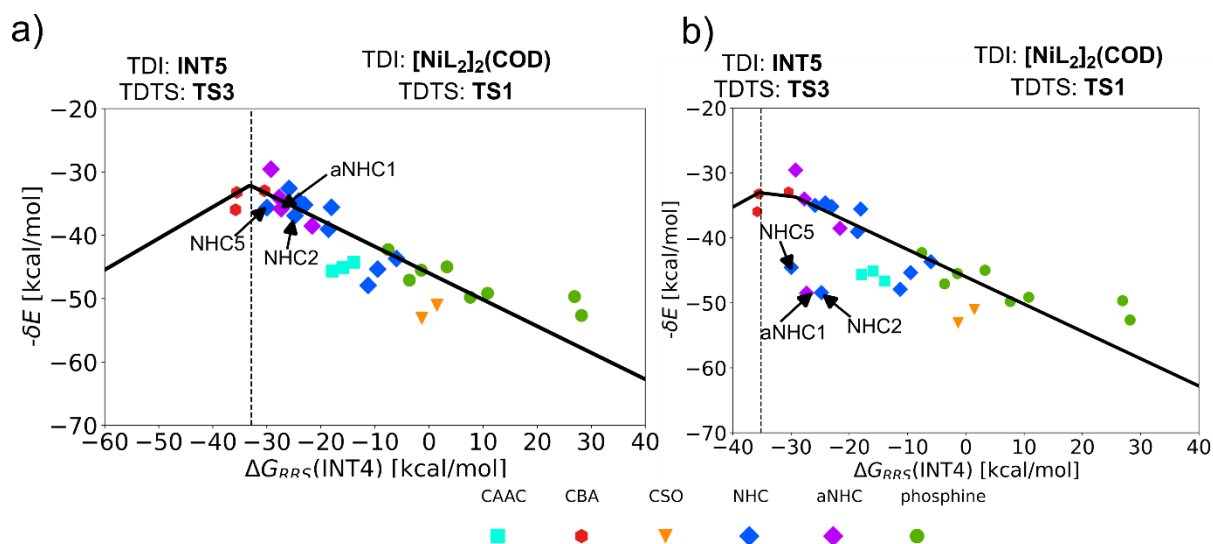

**Fig. S14** Energetic span volcano plot with  $[\text{NiL}_2]_2(\text{COD})$  as a reference state for the catalytic hydrodefluorination of trifluoromethylarene in the absence of CsF (L = carbene and phosphine). (a) Equilibrium between  $[\text{NiL}_2]_2(\text{COD})$  and  $\text{NiL}_2$  was not included. (b) Equilibrium between  $[\text{NiL}_2]_2(\text{COD})$  and  $\text{NiL}_2$  was considered in the catalytic cycle.

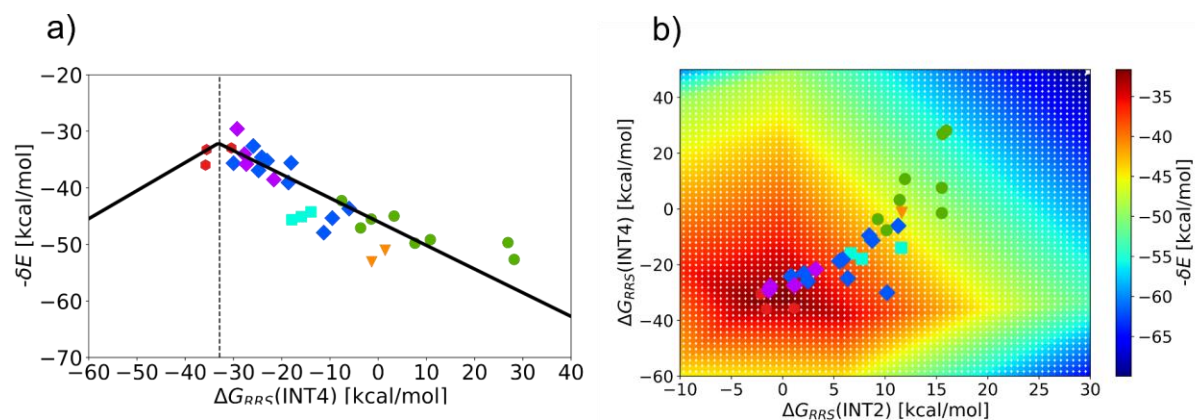

**Fig. S15** (a) Energetic span volcano plot with  $\Delta G_{\text{RRS,REF1}}(\text{INT4})$  as a descriptor and (b) activity map with  $\Delta G_{\text{RRS,REF1}}(\text{INT4})$  and  $\Delta G_{\text{RRS,REF1}}(\text{INT2})$  as descriptors. The  $[\text{NiL}_2]_2(\text{COD})$  (L = carbene and phosphine) was considered as a reference state for the catalytic hydrodefluorination of trifluoromethylarene in the absence of CsF (L = carbene and phosphine).

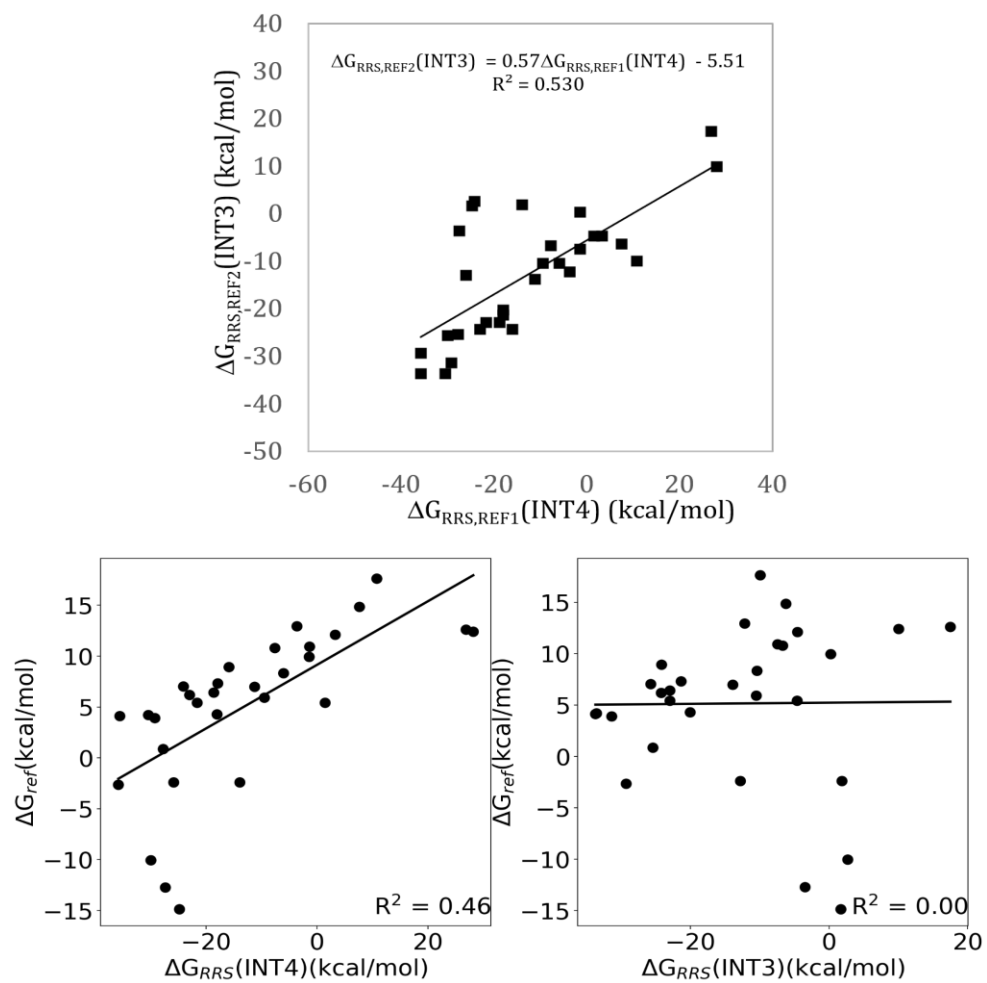

**Fig. S16** Linear free energy scaling relationships between (a)  $\Delta G_{\text{RRS,REF1}}(\text{INT4})$  and  $\Delta G_{\text{RRS,REF2}}(\text{INT3})$ , (b)  $\Delta G_{\text{RRS,REF1}}(\text{INT4})$  and  $\Delta G_{\text{ref}}$ , and (c)  $\Delta G_{\text{RRS,REF2}}(\text{INT3})$  and  $\Delta G_{\text{ref}}$ .

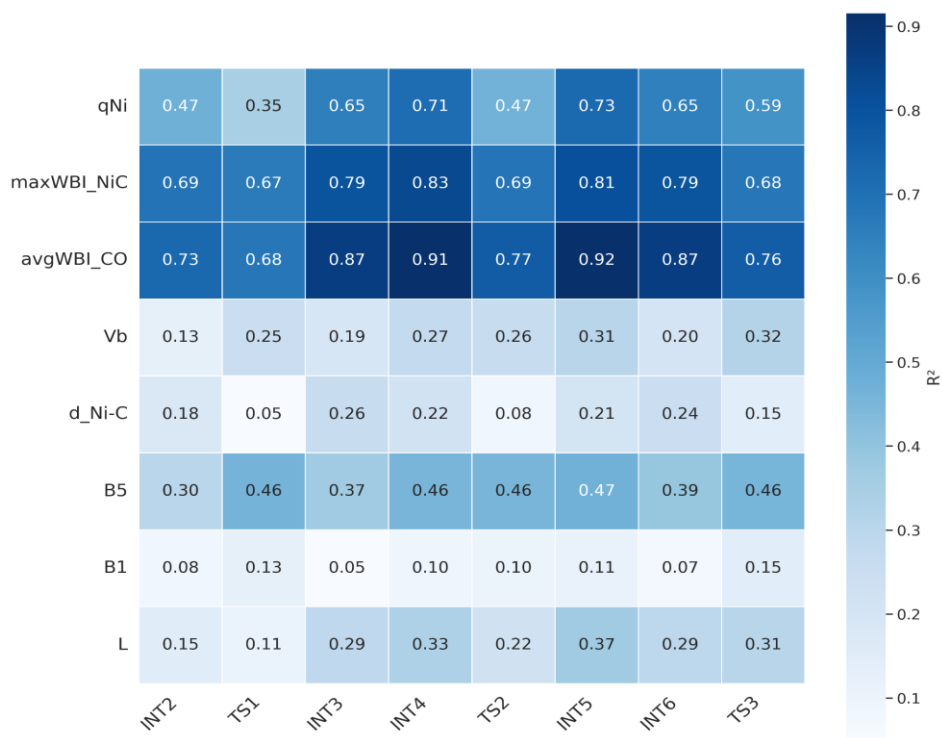

**Fig. S17** Correlation matrix between the electronic/steric variables obtained for  $\text{NiL}(\text{CO})_3$  (L = carbene and phosphine) and the relative energies of all species in the catalytic hydrodefluorination of trifluoromethylarene with  $[\text{NiL}_2]_2(\text{COD})$  as a reference state.

<sup>a</sup>The natural population analysis (NPA) charge on Ni ( $q_{\text{Ni}}$ ) and Wiberg bond index (WBI) were obtained from natural bond orbital (NBO) calculation of  $\text{NiL}(\text{CO})_3$ .

<sup>b</sup>Buried volume ( $V_b$ ) was calculated with Ni as the center of the sphere with Ni-L as the z-axis. The sphere radius used to calculate buried volume is 3.5 Å.

<sup>c</sup>Sterimol steric parameters: (i) B1 is the minimum distance perpendicular to the primary axis of Ni-L, indicating the shortest distance of a substituent on L and (ii) B5 represents the maximum distance perpendicular to the primary axis, signifying the farthest distance of a substituent on L. The Ni-L is chosen as the primary axis. (iii) L is the length of the substituent along the axis that passes through the point of attachment

<sup>d</sup> $d_{\text{Ni-C}}$  is the Ni-CO distance of  $\text{NiL}(\text{CO})_3$  in Å.

## Example for molecular volcano plot derivation

As an example, we considered constructing an energetic-span volcano plot for Ni-catalyzed hydrodefluorination of trifluoromethylarene without CsF, using  $[\text{NiL}_2]_2(\text{COD})$  as the reference state. Overall,  $\Delta G_{\text{RRS}}(\text{INT4})$  provides the best linear correlation with other relative free energies of intermediates and transition states in the profile. The LFESRs are given as below.

$$\Delta G_{\text{RRS}}(\text{INT2}) = 0.29\Delta G_{\text{RRS}}(\text{INT4}) + 0.85 \text{ kcal/mol} \quad (1)$$

$$\Delta G_{\text{RRS}}(\text{TS1}) = 0.42\Delta G_{\text{RRS}}(\text{INT4}) + 45.99 \text{ kcal/mol} \quad (2)$$

$$\Delta G_{\text{RRS}}(\text{INT3}) = 0.86\Delta G_{\text{RRS}}(\text{INT4}) + 3.36 \text{ kcal/mol} \quad (3)$$

$$\Delta G_{\text{RRS}}(\text{TS2}) = 0.78\Delta G_{\text{RRS}}(\text{INT4}) + 20.53 \text{ kcal/mol} \quad (4)$$

$$\Delta G_{\text{RRS}}(\text{INT5}) = 0.73\Delta G_{\text{RRS}}(\text{INT4}) - 20.37 \text{ kcal/mol} \quad (5)$$

$$\Delta G_{\text{RRS}}(\text{INT6}) = 0.67\Delta G_{\text{RRS}}(\text{INT4}) - 18.03 \text{ kcal/mol} \quad (6)$$

$$\Delta G_{\text{RRS}}(\text{TS3}) = 0.24\Delta G_{\text{RRS}}(\text{INT4}) - 4.69 \text{ kcal/mol} \quad (7)$$

$$\Delta G_{\text{rxn}} = -140.17 \text{ kcal/mol} \quad (8)$$

The negative of energetic span ( $-\delta E$ ) is used to describe the catalytic activity.

$$\begin{aligned} \delta E &= \max_{i,j} (T_i - I_j + \delta G_{ij}) \\ \delta G'_{ij} &= \begin{cases} \Delta G_r & \text{if } i > j \\ 0 & \text{if } i \leq j \end{cases} \end{aligned} \quad 9$$

**TDI: INT5/ TDTS: TS3**

$$\Delta G_{\text{RRS}}(\text{TS3}) - \Delta G_{\text{RRS}}(\text{INT5}) = -0.66\Delta G_{\text{RRS}}(\text{INT4}) + 15.62 \text{ kcal/mol} \quad 10$$

**TDI:  $[\text{NiL}_2]_2(\text{COD})$ / TDTS: TS1**

$$\Delta G_{\text{RRS}}(\text{TS1}) - \Delta G_{\text{RRS}} = \Delta G_{\text{RRS}}(\text{TS1}) = 0.42\Delta G_{\text{RRS}}(\text{INT4}) + 45.99 \text{ kcal/mol} \quad 11$$



## Multivariate linear regression analysis

$\text{NiL}(\text{CO})_3$  with each individual ligand L was initially represented by SMILES strings. Then, OpenBabel<sup>7, 8</sup> was used to convert SMILES into a 3D structure and MMFF94<sup>7</sup> force field was used to perform geometry optimization and conformation search. The 3D structure from Openbabel was further optimized using  $\omega\text{B97XD}^9/\text{def2-SVP}^{10}$  in gas phase. Based on the DFT-optimized structures, Morfeus was used to measure the steric descriptors  $V_b$ . Based on the  $\omega\text{B97XD}/\text{def2-TZVP}$  single-point energy calculation in gas phase, natural bond orbital (NBO)<sup>1</sup> calculations were carried out to obtain electronic variables, i.e., Wiberg bond index (WBI)<sup>11</sup> and natural population analysis (NPA) charge. These non-energetic descriptors were then chosen as molecular features to perform regression analysis based on the multivariate linear regression model.

## References

1. Eric Glendening, Clark Landis and F. Weinhold, *NBO 6.0*, 2013.
2. A. Poater, F. Ragone, S. Giudice, C. Costabile, R. Dorta, S. P. Nolan and L. Cavallo, *Organometallics*, 2008, **27**, 2679-2681.
3. D. M. Lustosa and A. Milo, *ACS Catalysis*, 2022, **12**, 7886-7906.
4. A. F. Zahrt, S. V. Athavale and S. E. Denmark, *Chemical Reviews*, 2020, **120**, 1620-1689.
5. J. Werth and M. S. Sigman, *ACS Catalysis*, 2021, **11**, 3916-3922.
6. H. Iwamoto, H. Imiya, M. Ohashi and S. Ogoshi, *Journal of the American Chemical Society*, 2020, **142**, 19360-19367.
7. T. A. Halgren, *Journal of Computational Chemistry*, 1996, **17**, 490-519.
8. N. M. O'Boyle, M. Banck, C. A. James, C. Morley, T. Vandermeersch and G. R. Hutchison, *Journal of Cheminformatics*, 2011, **3**, 33.
9. J.-D. Chai and M. Head-Gordon, *Physical Chemistry Chemical Physics*, 2008, **10**, 6615-6620.
10. F. Weigend and R. Ahlrichs, *Physical Chemistry Chemical Physics*, 2005, **7**, 3297-3305.
11. K. B. Wiberg, *Journal of the American Chemical Society*, 1968, **90**, 59-63.
